# Supplementary material for: Donor selection for adoptive immunotherapy with NK cells in AML patients: Comparison between analysis of lytic NK cell clones and phenotypical identification of alloreactive NK cell repertoire
Source: Frontiers journal article supplement (doi:10.3389/fimmu.2023.1111419), 2023-02-14
Supplement: Presentation_1.PDF [file Presentation_1.PDF]

## SUPPLEMENTARY MATERIAL

### 1.1 Supplementary Figures

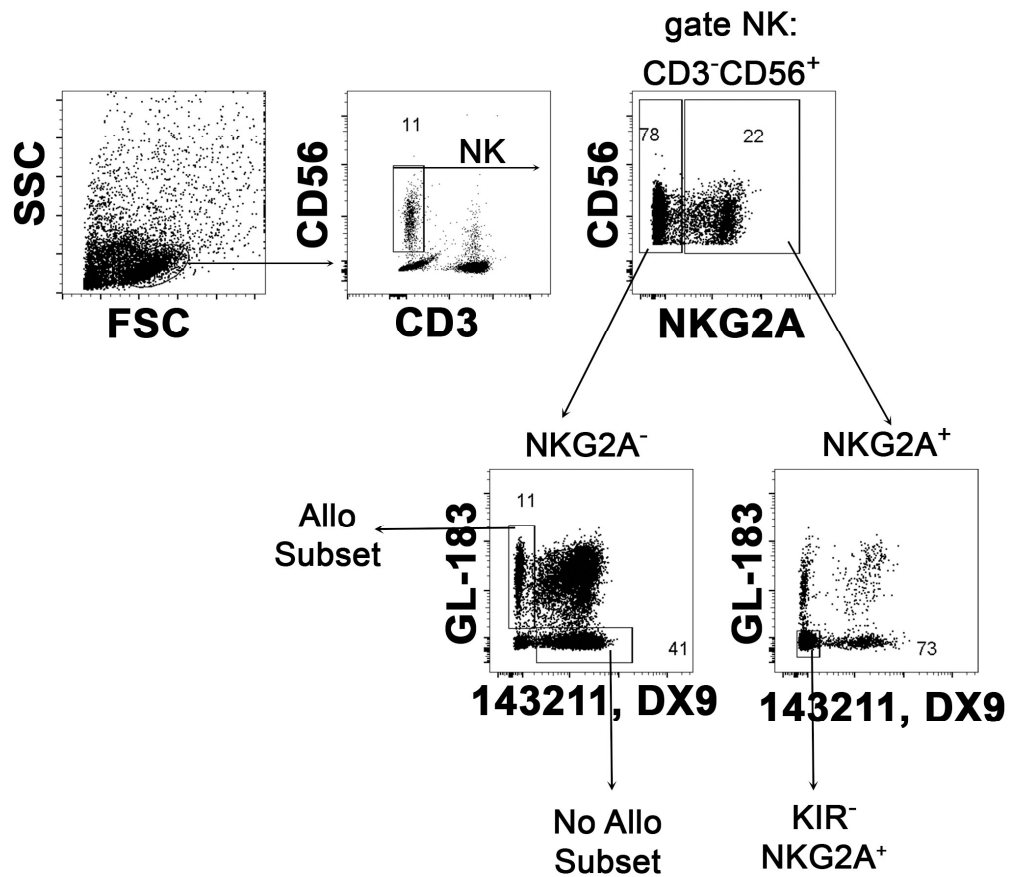

**Supplementary Figure 1.** Gating strategy to define NK cell subsets in degranulation assays.

The gating strategy to identify different NK cell subsets for degranulation assays of a representative donor (D of pt#16) is shown. CD3<sup>-</sup> CD56<sup>+</sup> NK cells can first be dissected into NKG2A<sup>-</sup> and NKG2A<sup>+</sup> cells. Among NKG2A<sup>-</sup> NK cells, appropriate anti-KIR mAb combinations allow to define the alloreactive subset (Allo Subset), the non-alloreactive subset (No Allo Subset). Among the NKG2A<sup>+</sup> NK cells, the indicated region identifies the KIR<sup>-</sup> NKG2A<sup>+</sup> subset.

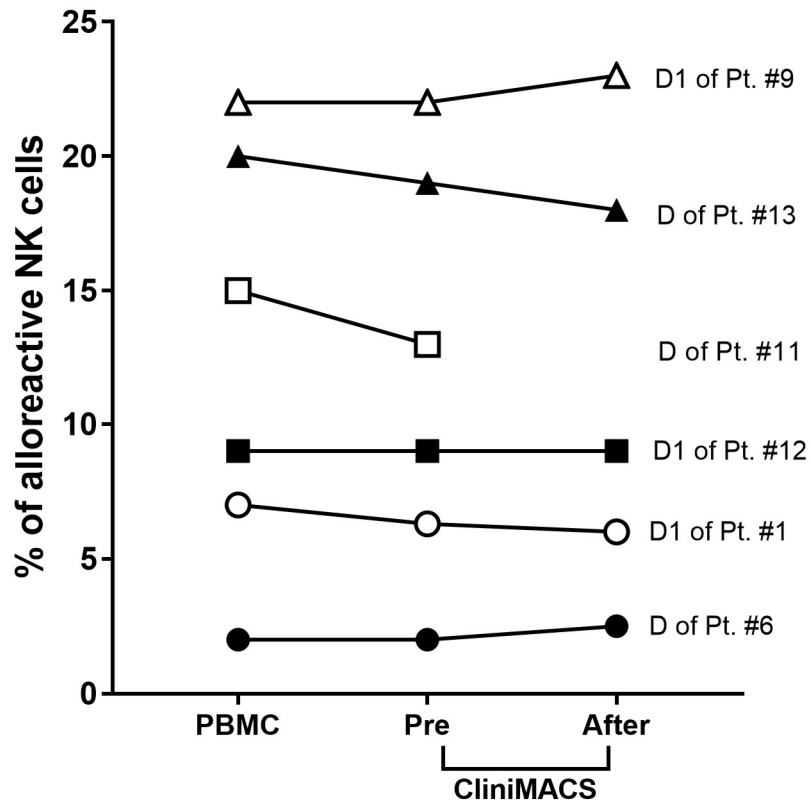

**Supplementary Figure 2.** Percentage of the alloreactive NK cell subset on PBMC ( $n=6$ ), leukapheresis (pre-CliniMACS,  $n=6$ ) and purified NK cells (after-CliniMACS,  $n=5$ ), in different donors (of the group of patients infused at IRCCS Ospedale Policlinico San Martino, Genova). Gate:  $CD3^- CD56^+ CD45^+$  lymphocytes.

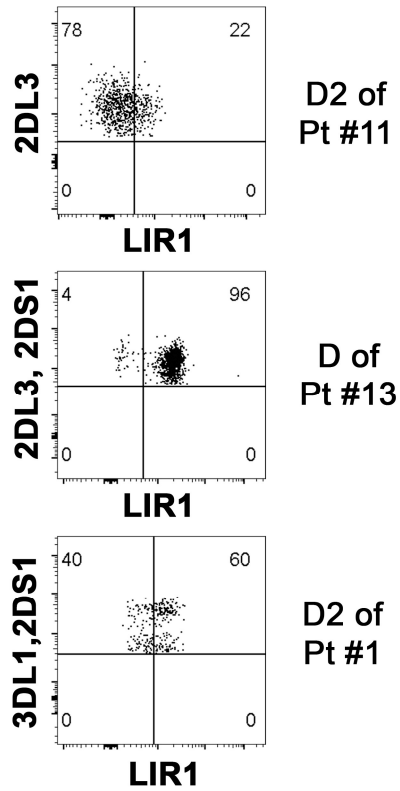

**Supplementary Figure 3.** Evaluation of the alloreactive NK cell subset excluding LIR1<sup>+</sup> cells. In three representative donors, the expression of LIR1 gating on the alloreactive cell subset is shown.

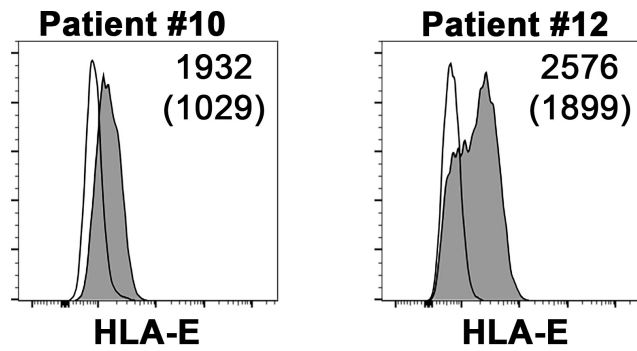

**Supplementary Figure 4.** Cytofluorimetric analysis of HLA-E expression on PHA-blasts derived from two patients. The staining was performed using 3D12 mAb followed by anti-mouse IgG1-PE (Southern Biotech) secondary reagent. Negative controls (i.e. cells only stained with the secondary reagent) are shown as empty histograms. Numbers and numbers in brackets represent the MFI and  $\Delta$ MFI (i.e. the difference between MFI of cells stained with 3D12 and MFI of negative control), respectively.

## 1.2 Supplementary Tables

**Supplementary Table 1: List of antibodies.**

| Clone             | Specificity                   | Fluorochrome            | Supplier/Reference                         |
|-------------------|-------------------------------|-------------------------|--------------------------------------------|
| UCHT1             | CD3                           | PE-CF594, BV510         | BD Bioscience, San José, CA USA            |
| BW264/56          | CD3                           | VioBlue                 | Miltenyi Biotec, Bergisch Gladbach Germany |
| NCAM 16.2         | CD56                          | BV421                   | BD Bioscience                              |
| N901              | CD56                          | PE-Cy7                  | Beckman Coulter, Brea, CA USA              |
| 5B1               | CD45                          | APC-Vio770              | Miltenyi Biotec                            |
| CHL               | KIR2DL2/S2/L3                 | FITC                    | BD Bioscience                              |
| H4A3              | CD107a                        | PE                      | BD Bioscience                              |
| EB6B <sup>§</sup> | KIR2DL1/S1 and<br>KIR2DL3*005 | PE, PE-Cy7              | Beckman Coulter                            |
| GL-183            | KIR2DL2/S2/L3                 | PE, PE-Cy7, APC         | Beckman Coulter                            |
| Z27               | KIR3DL1/S1                    | PE, APC                 | Beckman Coulter                            |
| FES172            | KIR2DS4                       | APC                     | Beckman Coulter                            |
| Z199              | NKG2A                         | PE, APC                 | Beckman Coulter                            |
| REA110            | NKG2A                         | FITC                    | Miltenyi Biotec                            |
| DX9               | KIR3DL1                       | FITC, PE-Vio770         | Miltenyi Biotec                            |
| 143211            | KIR2DL1, 2DS5                 | FITC, PE                | R&D systems, Minneapolis, MN USA           |
| HP-F1             | LIR1 (CD85j)                  | APC                     | ThermoFisher, Waltham, MA USA,             |
| ECM-41            | KIR2DL3 (no *005)             | Unconjugated (IgM)      | (36, 37)                                   |
| 1F12              | KIR2DS2 and<br>KIR2DL3        | Unconjugated<br>(IgG2b) | (38)                                       |
| 3D12              | HLA-E                         | Unconjugated (IgG1)     | Biolegend, San Diego, CA USA               |

<sup>§</sup> EB6B has been indicated as EB6 in the text

**Supplementary Table 2: Antibody combinations used to identify the alloreactive NK cell subsets.**

| Type of alloreactivity <sup>#</sup> | Permissive iKIR | Antibody combinations* |                    |                   |
|-------------------------------------|-----------------|------------------------|--------------------|-------------------|
|                                     |                 | PE-conjugated          | FITC-conjugated    | APC-conjugated    |
| Allo C1                             | KIR2DL2/L3      | GL-183 <sup>§</sup>    | 143211, DX9, NKG2A | LIR1 <sup>¶</sup> |
| Allo C2                             | KIR2DL1         | EB6B                   | CHL, DX9, NKG2A    | LIR1 <sup>¶</sup> |
| Allo Bw4                            | KIR3DL1         | Z27 <sup>§</sup>       | 143211, CHL, NKG2A | LIR1 <sup>¶</sup> |

<sup>#</sup> Defined on the basis of KIR-L mismatch (present in the donor and missing in the patient).

\* Appropriate fluorochrome-conjugated anti-CD3 and anti-CD56 mAb combinations were also used to identify NK cells in PBMC.

<sup>§</sup> In KIR2DS1<sup>+</sup> donors, EB6-PE can be also added in the alloreactive NK cell subset.

<sup>¶</sup> Optional.

The size of the alloreactive NK cell subset is calculated as the percentage of PE-positive and FITC-negative cells.

**Supplementary Table 3: Antibody combinations used in degranulation assay to identify different NK cell populations, including the alloreactive NK cell subset.**

| Type of alloreactivity | Permissive iKIR | Antibody combinations* |                 |                |
|------------------------|-----------------|------------------------|-----------------|----------------|
|                        |                 | PC7-conjugated         | FITC-conjugated | APC-conjugated |
| Allo C1                | KIR2DL2/L3      | GL-183 <sup>§</sup>    | 143211, DX9     | NKG2A          |
| Allo C2                | KIR2DL1         | EB6B                   | CHL, DX9        | NKG2A          |
| Allo Bw4               | KIR3DL1         | Z27 <sup>§</sup>       | 143211, CHL     | NKG2A          |

<sup>§</sup>In KIR2DS1<sup>+</sup> donors and HLA-C2<sup>+</sup> patients pairs, EB6-PC7 was also added to include, in the alloreactive NK cell subset, this aKIR.
